# Supplementary material
Source: PubMed Central journal article supplement (PMC10591876)
Supplement: NIHMS1931719-supplement-Supplemental_Material.pdf [file NIHMS1931719-supplement-Supplemental_Material.pdf]

## Supplemental Material

**Supplemental Table 1: Baseline characteristics of full sample (N = 891)**

|                                                             | <b>API<br/>(N=591)</b> | <b>Control (N=300)</b> | <b>Overall (N=891)</b> |
|-------------------------------------------------------------|------------------------|------------------------|------------------------|
|                                                             | <b>M(SD)/N(%)</b>      | <b>M(SD)/N(%)</b>      | <b>M(SD)/N(%)</b>      |
| <b>Sex</b>                                                  |                        |                        |                        |
| Female                                                      | 372 (62.9%)            | 184 (61.3%)            | 556 (62.4%)            |
| Male                                                        | 219 (37.1%)            | 116 (38.7%)            | 335 (37.6%)            |
| <b>Race/ethnicity</b>                                       |                        |                        |                        |
| White                                                       | 451 (76.3%)            | 233 (77.7%)            | 684 (76.8%)            |
| Asian                                                       | 60 (10.2%)             | 31 (10.3%)             | 91 (10.2%)             |
| Black                                                       | 18 (3.0%)              | 14 (4.7%)              | 32 (3.6%)              |
| Hispanic/Latinx                                             | 29 (4.9%)              | 10 (3.3%)              | 39 (4.4%)              |
| Other/Multi                                                 | 33 (5.6%)              | 12 (4.0%)              | 45 (5.1%)              |
| <b>Pre-college intention to pledge Greek life</b>           |                        |                        |                        |
| No                                                          | 370 (62.6%)            | 190 (63.3%)            | 560 (62.9%)            |
| Yes/Undecided                                               | 221 (37.4%)            | 110 (36.7%)            | 331 (37.1%)            |
| <b>Parents' highest level of education</b>                  |                        |                        |                        |
| Bachelor's or higher                                        | 473 (80.0%)            | 241 (80.3%)            | 714 (80.1%)            |
| Less than bachelor's                                        | 118 (20.0%)            | 59 (19.7%)             | 177 (19.9%)            |
| <b>Biological family member with clear drinking problem</b> |                        |                        |                        |
| No                                                          | 374 (63.3%)            | 179 (59.7%)            | 553 (62.1%)            |
| Yes                                                         | 216 (36.5%)            | 121 (40.3%)            | 337 (37.8%)            |
| <b>Average patient health questionnaire score (0-3)</b>     | 0.55 (0.56)            | 0.49 (0.50)            | 0.53 (0.54)            |
| <b>Suicidal ideation score (0-3)</b>                        | 0.08 (0.33)            | 0.04 (0.20)            | 0.06 (0.29)            |
| <b>Average perceived stress score (0-4)</b>                 | 1.31 (0.67)            | 1.33 (0.68)            | 1.32 (0.67)            |
| <b>Average general anxiety disorder score (0-3)</b>         | 0.61 (0.63)            | 0.56 (0.62)            | 0.60 (0.63)            |
| <b>Pre-college binge drinking</b>                           |                        |                        |                        |
| Never                                                       | 423 (71.6%)            | 219 (73.0%)            | 642 (72.1%)            |
| Yes                                                         | 168 (28.4%)            | 80 (26.7%)             | 248 (27.8%)            |
| <b>Pre-college alcohol consequences (0-24)</b>              | 1.41 (2.40)            | 1.20 (1.96)            | 1.34 (2.26)            |

|                                                                         |              |              |              |
|-------------------------------------------------------------------------|--------------|--------------|--------------|
| <b>Perceived norm: % of first-year students who binge drink (0-100)</b> | 22.7 (17.7)  | 23.1 (16.4)  | 22.8 (17.2)  |
| <b>Average social motives score (0-5)</b>                               | 1.69 (1.64)  | 1.52 (1.55)  | 1.63 (1.61)  |
| <b>Average enhancement motives score (0-5)</b>                          | 1.50 (1.50)  | 1.38 (1.45)  | 1.46 (1.48)  |
| <b>Average coping motives score (0-5)</b>                               | 0.87 (0.99)  | 0.77 (0.85)  | 0.84 (0.94)  |
| <b>Average conformity motives score (0-5)</b>                           | 0.78 (0.86)  | 0.71 (0.80)  | 0.76 (0.84)  |
| <b>Readiness for <i>pre-contemplation</i> score (-8 to 8)</b>           | -1.80 (3.16) | -1.92 (2.93) | -1.84 (3.09) |
| <b>Readiness for <i>contemplation</i> score (-8 to 8)</b>               | -4.84 (2.93) | -4.95 (2.81) | -4.88 (2.89) |
| <b>Readiness to take <i>action</i> score (-8 to 8)</b>                  | -2.84 (3.33) | -3.08 (3.44) | -2.92 (3.37) |
| <b>Follow-up binge drinking frequency (0-10)</b>                        | 1.06 (1.70)  | 1.13 (1.87)  | 1.08 (1.76)  |
| <b>Follow-up alcohol consequences (0-24)</b>                            | 2.34 (3.48)  | 2.29 (3.31)  | 2.32 (3.43)  |

---

*Note:* API=Adaptive Preventive Intervention
